# Supplementary material for: Effect of local coordination on catalytic activities and selectivities of Fe-based catalysts for N2 reduction
Source: Royal Society of Chemistry journal article supplement (doi:10.1039/d1cp05140g), 2022-01-01
Supplement: d1cp05140g1.pdf [file d1cp05140g1.pdf]

## Supplementary Information

### Effect of local coordination on catalytic activities and selectivities of Fe-based catalysts for N<sub>2</sub> reduction

Xiaohui Zhang,<sup>a</sup> Tianyi Wang,<sup>b,c</sup> Congyun Zhang,<sup>a</sup> Yihui Zou,<sup>a</sup> Jun Ren,<sup>d</sup> Pengcheng Cai,<sup>a</sup> Chenghua Sun,<sup>\*,b,c</sup> and Dongjiang Yang<sup>\*,a,e</sup>

<sup>a</sup>School of Environmental Science and Engineering, State Key Laboratory of Bio-fibers and Eco-textiles, Shandong Collaborative Innovation Center of Marine Biobased Fibers and Ecological Textiles, Qingdao University, Qingdao 266071, P. R. China

<sup>b</sup>School of Chemical Engineering and Energy Technology, Dongguan University of Technology, Dongguan 523808, P. R. China

<sup>c</sup>Department of Chemistry and Biotechnology and Centre for Translational Atomaterials, Faculty of Science, Engineering and Technology, Swinburne University of Technology, Hawthorn, Victoria 3122, Australia

<sup>d</sup>School of Chemical and Environmental Engineering, North University of China, Taiyuan, 030051, P. R. China

<sup>e</sup>Queensland Micro- and Nanotechnology Centre (QMNC), Griffith University, Nathan Campus, Brisbane, Queensland, 4111, Australia

\*Corresponding authors: [chenghuasun@swin.edu.au](mailto:chenghuasun@swin.edu.au) (C. Sun);

[d.yang@qdu.edu.cn](mailto:d.yang@qdu.edu.cn) (D. Yang)

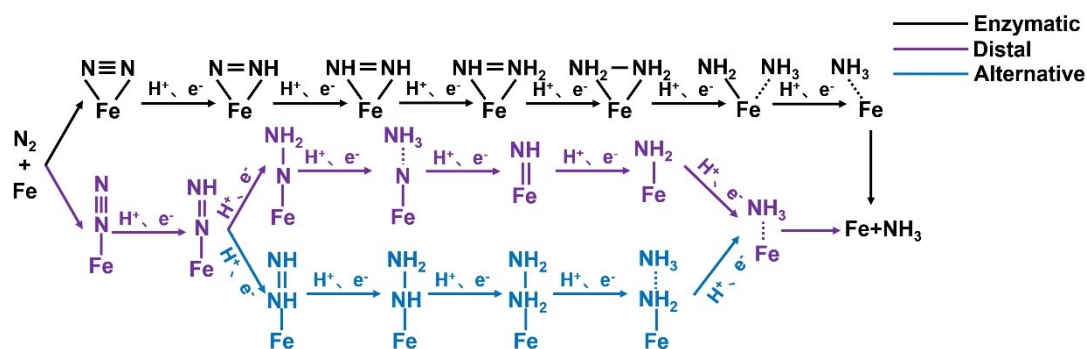

**Scheme:** Schematic depiction of three mechanisms for NRR on  $Fe_{1/2/3}C_xN_y$ . The Fe represents the Fe atom active on the electrocatalyst.

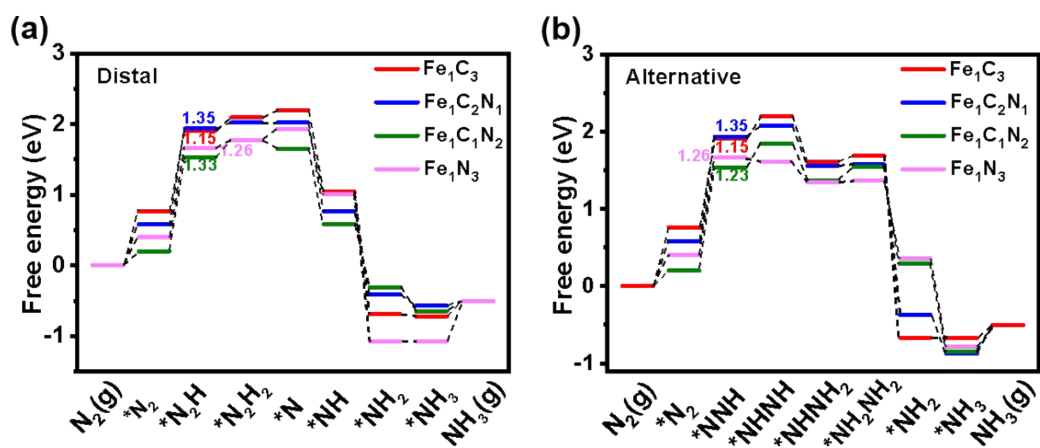

**Fig. S1** Free energy diagrams of  $Fe_1C_xN_y$  on (a) distal pathway, (b) alternative pathway and (c) enzymatic pathway.

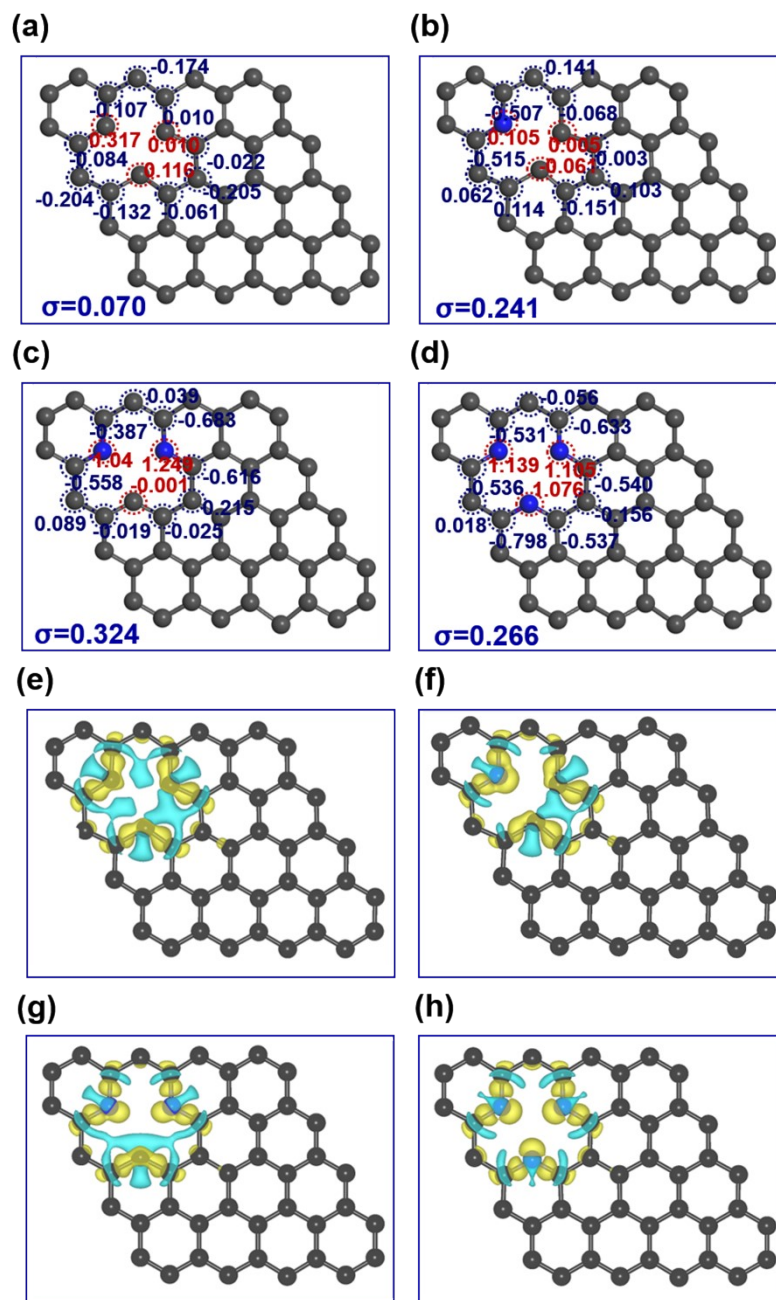

**Fig. S2** (a)-(d) The number of Bader charge for the carbon atoms on the different  $C_xN_y$  ligand environments; (e)-(h) the charge density difference of the corresponding ligand environment.

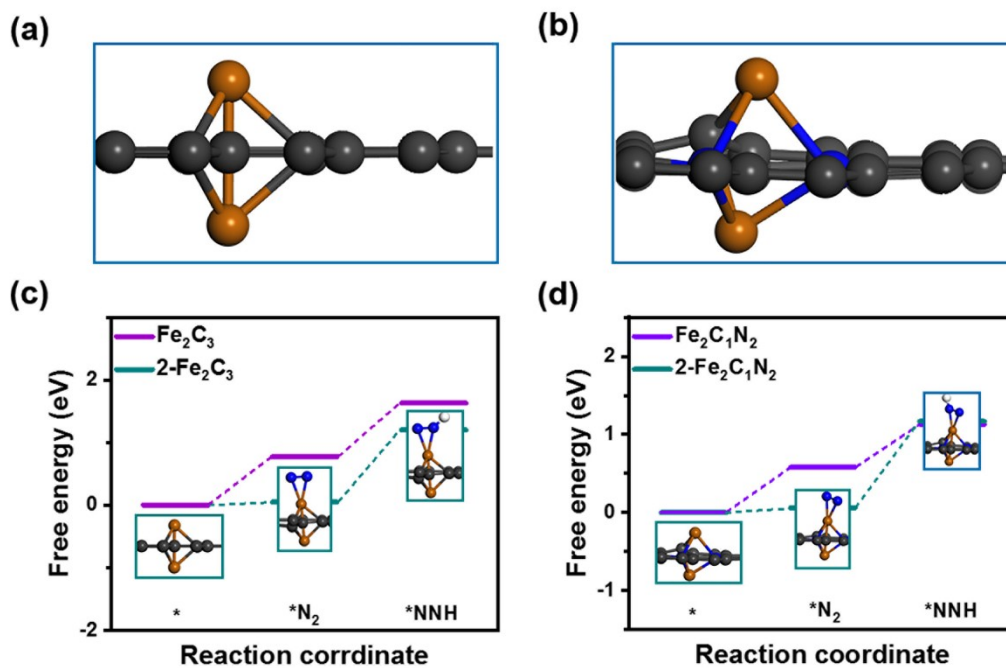

**Fig. S3** The side views of geometry structure of (a)  $2\text{-Fe}_2\text{C}_3$  and (b)  $2\text{-Fe}_2\text{C}_1\text{N}_2$ ; (c) schematic depiction of the reaction pathways of  $\text{Fe}_2\text{C}_3$  and  $2\text{-Fe}_2\text{C}_3$ ; (d) schematic depiction of the reaction pathways of  $\text{Fe}_2\text{C}_1\text{N}_2$  and  $2\text{-Fe}_2\text{C}_1\text{N}_2$ .

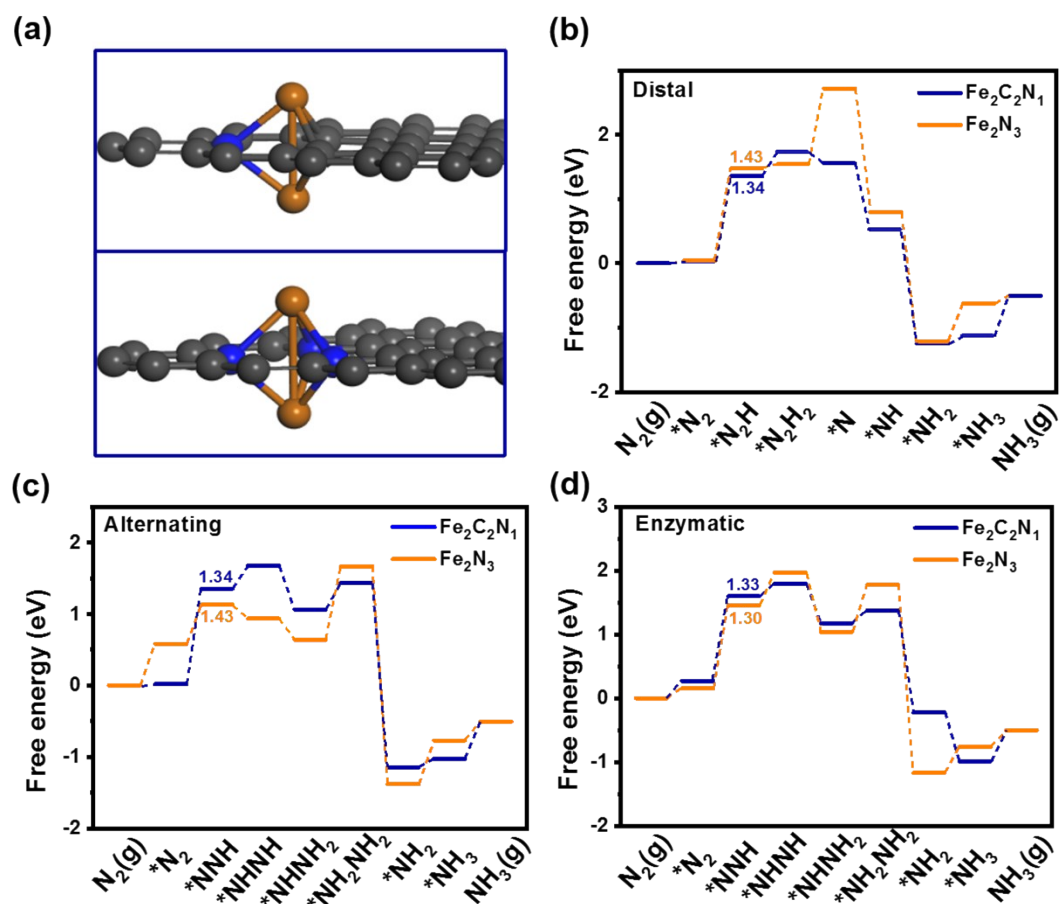

**Fig. S4** The side views of geometry structure of (a) Fe<sub>2</sub>C<sub>2</sub>N<sub>1</sub> and Fe<sub>2</sub>N<sub>3</sub>; free energy diagrams of Fe<sub>2</sub>C<sub>2</sub>N<sub>1</sub> and Fe<sub>2</sub>N<sub>3</sub> on (b) distal pathway, (c) alternative pathway and (d) enzymatic pathway.

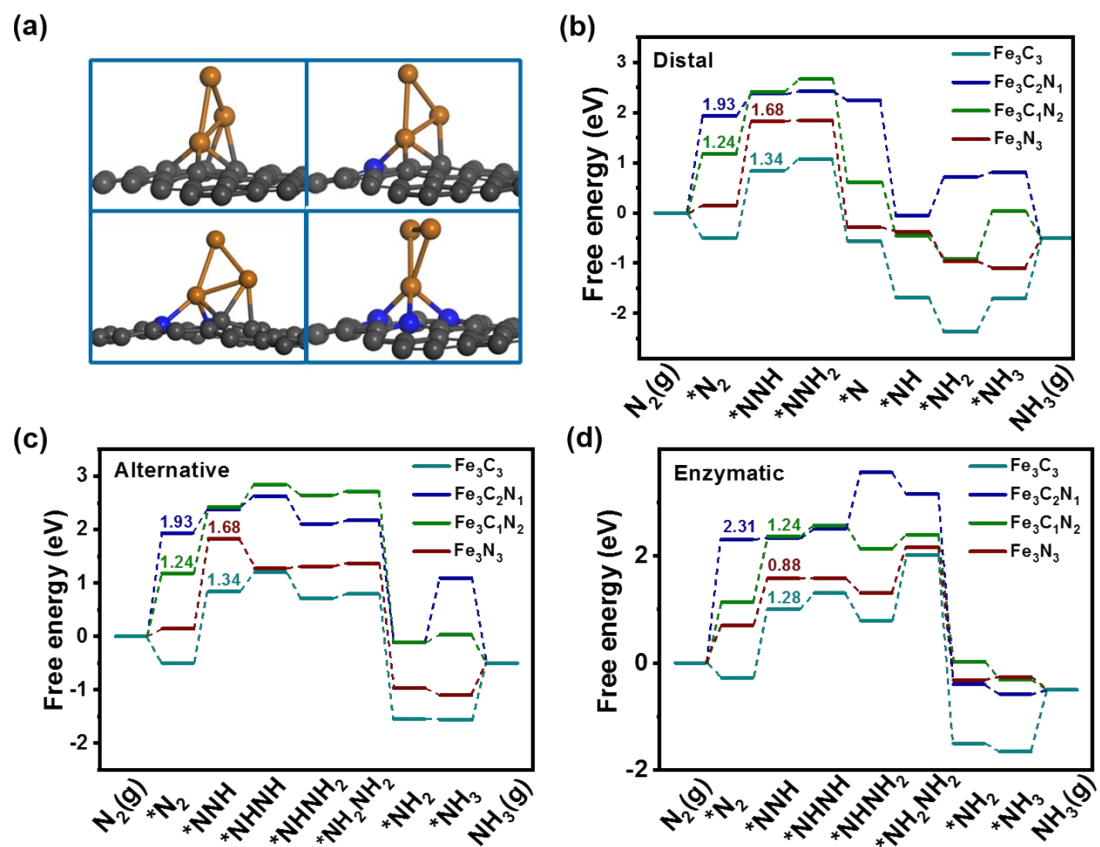

**Fig. S5** The side views of geometry structure of (a) Fe<sub>3</sub>C<sub>3</sub>, (b) Fe<sub>3</sub>C<sub>2</sub>N<sub>1</sub>, (c) Fe<sub>3</sub>C<sub>1</sub>N<sub>2</sub> and (d) Fe<sub>3</sub>N<sub>3</sub>; free energy diagrams of Fe<sub>3</sub>C<sub>x</sub>N<sub>y</sub> on (c) distal pathway, (d) alternative pathway and (e) enzymatic pathway.

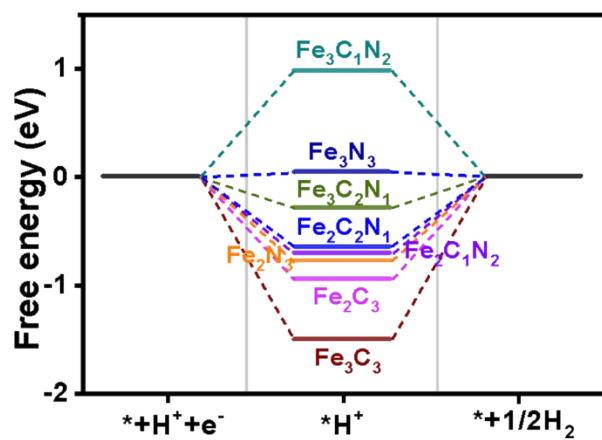

**Fig. S6** Free energy diagrams of the HER on the catalysts.



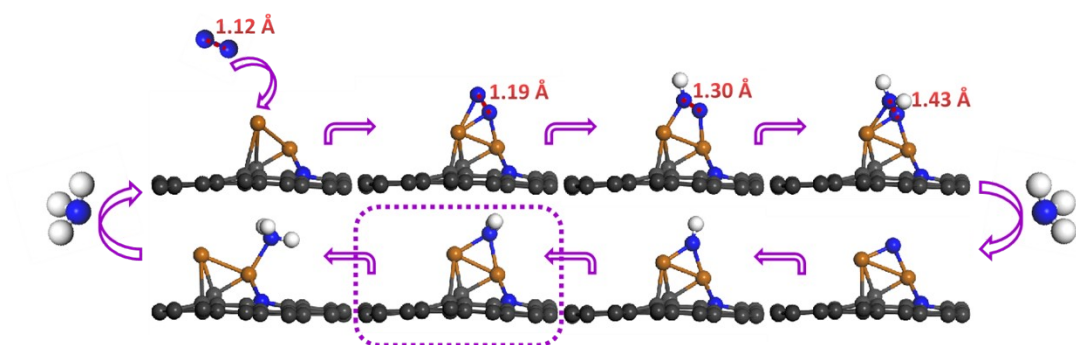

**Fig. S7** The corresponding intermediate configurations on the distal pathways of  $\text{Fe}_2\text{C}_1\text{N}_2$ .

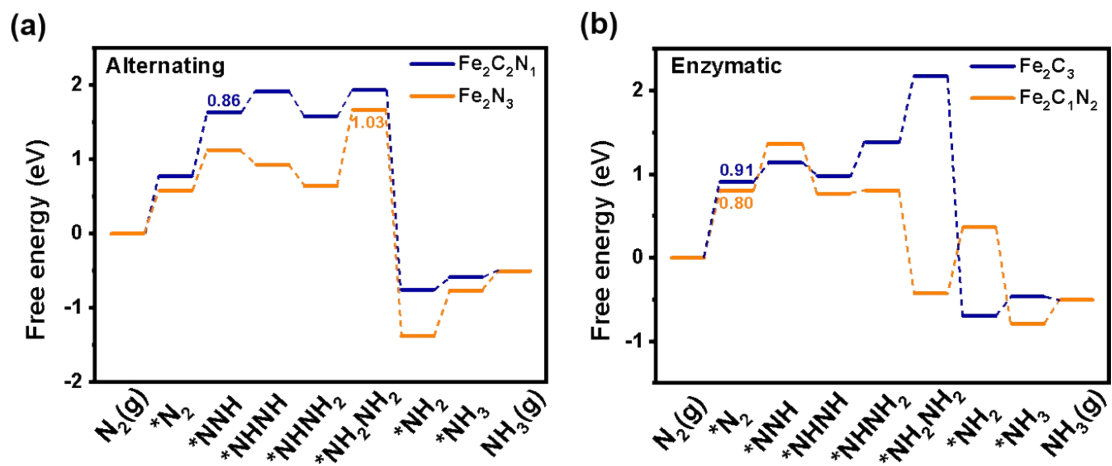

**Fig. S8** Free energy diagrams of  $Fe_2C_3$  and  $Fe_2C_1N_2$  on (a) alternative pathway and (b) enzymatic pathway.

**Table S1** The calculated  $\Delta ZPE$  and  $T\Delta S$  of various NRR reaction intermediates of $Fe_{1/2/3}C_xN_y$ .

| <b>Adsorption species</b>        | <b><math>\Delta ZPE</math> (eV)</b> | <b><math>T\Delta S</math> (eV)</b> |
|----------------------------------|-------------------------------------|------------------------------------|
| *N <sub>2</sub>                  | 0.156                               | 0.116                              |
| *NNH                             | 0.350                               | 0.183                              |
| *NNH <sub>2</sub>                | 0.731                               | 0.179                              |
| *N                               | 0.027                               | 0.118                              |
| *NH                              | 0.266                               | 0.117                              |
| *NH <sub>2</sub>                 | 0.624                               | 0.179                              |
| *NH <sub>3</sub>                 | 0.951                               | 0.149                              |
| *NHNH                            | 0.827                               | 0.207                              |
| *NHNH <sub>2</sub>               | 1.115                               | 0.243                              |
| *NH <sub>2</sub> NH <sub>2</sub> | 1.475                               | 0.160                              |
| *NH <sub>2</sub>                 | 0.624                               | 0.179                              |
| *NH <sub>3</sub>                 | 0.951                               | 0.149                              |

**Table S2** The average of the Bader charge on the different  $C_xN_y$  ligand environments.

| <b>Ligand Environment</b>     | <b>Average (e)</b> |
|-------------------------------|--------------------|
| C <sub>3</sub>                | -0.111             |
| C <sub>2</sub> N <sub>1</sub> | -0.092             |
| C <sub>1</sub> N <sub>2</sub> | -0.216             |
| N <sub>3</sub>                | -0.419             |

**Table S3** N≡N bond length, Bader charge of the absorbed N<sub>2</sub> and calculated ΔG<sub>max</sub>

for the catalysts.

| <b>Catalyst</b>                                 | <b>d<sub>N-N</sub> (Å)</b> | <b>Charge (e)</b> | <b>ΔG<sub>max</sub> (eV)</b> |
|-------------------------------------------------|----------------------------|-------------------|------------------------------|
| <b>Fe<sub>2</sub>C<sub>2</sub>N<sub>1</sub></b> | <b>1.17</b>                | <b>0.38</b>       | <b>1.33</b>                  |
| <b>Fe<sub>2</sub>N<sub>3</sub></b>              | <b>1.18</b>                | <b>0.34</b>       | <b>1.30</b>                  |
| <b>Fe<sub>3</sub>C<sub>3</sub></b>              | <b>1.15</b>                | <b>0.24</b>       | <b>1.28</b>                  |
| <b>Fe<sub>3</sub>C<sub>2</sub>N<sub>1</sub></b> | <b>1.13</b>                | <b>0.22</b>       | <b>1.93</b>                  |
| <b>Fe<sub>3</sub>C<sub>1</sub>N<sub>2</sub></b> | <b>1.15</b>                | <b>0.28</b>       | <b>1.24</b>                  |
| <b>Fe<sub>3</sub>N<sub>3</sub></b>              | <b>1.16</b>                | <b>0.41</b>       | <b>0.88</b>                  |

**Table S4** The  $\Delta G_{\max}$  of PLS for NRR on different catalysts.

| <b>Catalysts</b>                                | <b><math>\Delta G_{\max}</math><br/>(eV)</b> | <b>References</b>                             |
|-------------------------------------------------|----------------------------------------------|-----------------------------------------------|
| Fe(110)                                         | 1.39                                         | 10.1039/c8cy01845f. <sup>1</sup>              |
| Ti@N <sub>4</sub>                               | 0.69                                         | 10.1021/acscatal.8b00905. <sup>2</sup>        |
| Fe-Ti <sub>DA</sub> /GS                         | 0.88                                         | 10.1016/j.electacta.2020.135667. <sup>3</sup> |
| MoS <sub>2</sub>                                | 0.68                                         | 10.1002/adma.201800191. <sup>4</sup>          |
| Fe <sub>SA</sub> /MoS <sub>2</sub>              | 1.01                                         | 10.1039/c7cp08626a. <sup>5</sup>              |
| Fe@Fe-N <sub>3</sub> /C-CNTs                    | 1.66                                         | 10.1021/acscatal.8b03802. <sup>6</sup>        |
| FeN <sub>4</sub> -NG                            | 1.12                                         | 10.1016/j.jcat.2020.05.009. <sup>7</sup>      |
| <b>Fe<sub>2</sub>C<sub>1</sub>N<sub>2</sub></b> | <b>0.62</b>                                  | <b>This work</b>                              |

**Table S5 The atomic fractional coordinates of the Fe<sub>2</sub>C<sub>3</sub>.**

| <b>Atom</b> | <b>X</b> | <b>Y</b> | <b>Z</b> |
|-------------|----------|----------|----------|
| C           | 0.991819 | 0.002322 | 0.082669 |
| C           | 0.125036 | 0.068823 | 0.083569 |
| C           | 0.191746 | 0.002273 | 0.083545 |
| C           | 0.325073 | 0.068817 | 0.084820 |
| C           | 0.391873 | 0.002292 | 0.086427 |
| C           | 0.525046 | 0.068754 | 0.086698 |
| C           | 0.591545 | 0.001821 | 0.088759 |
| C           | 0.724938 | 0.068794 | 0.085191 |
| C           | 0.791626 | 0.002292 | 0.084716 |
| C           | 0.924968 | 0.068802 | 0.082801 |
| C           | 0.991424 | 0.202115 | 0.084009 |
| C           | 0.124522 | 0.268378 | 0.088175 |
| C           | 0.191513 | 0.201997 | 0.087484 |
| C           | 0.324628 | 0.267968 | 0.090967 |
| C           | 0.391857 | 0.201971 | 0.087356 |
| C           | 0.525192 | 0.268329 | 0.087691 |
| C           | 0.591870 | 0.201906 | 0.085529 |
| C           | 0.725004 | 0.268632 | 0.084301 |
| C           | 0.791625 | 0.202101 | 0.083447 |
| C           | 0.924868 | 0.268791 | 0.083940 |
| C           | 0.991864 | 0.402341 | 0.086284 |
| C           | 0.123889 | 0.468455 | 0.093871 |
| C           | 0.190529 | 0.401424 | 0.096403 |
| C           | 0.320682 | 0.461627 | 0.107968 |
| C           | 0.391102 | 0.400982 | 0.099528 |
| C           | 0.525309 | 0.467333 | 0.097553 |
| C           | 0.592040 | 0.401630 | 0.090443 |
| C           | 0.725297 | 0.468560 | 0.086507 |
| C           | 0.791706 | 0.401895 | 0.084095 |
| C           | 0.924929 | 0.468830 | 0.084142 |
| C           | 0.991551 | 0.602062 | 0.083987 |
| C           | 0.124592 | 0.668973 | 0.087958 |
| C           | 0.190607 | 0.602262 | 0.097089 |
| C           | 0.320208 | 0.672245 | 0.110253 |
| C           | 0.531160 | 0.672409 | 0.109078 |
| C           | 0.592893 | 0.602476 | 0.098414 |
| C           | 0.726379 | 0.669273 | 0.090038 |
| C           | 0.792108 | 0.602038 | 0.086097 |
| C           | 0.925246 | 0.669016 | 0.083338 |
| C           | 0.991885 | 0.802392 | 0.082905 |
| C           | 0.125134 | 0.869039 | 0.083344 |

---

|    |          |          |          |
|----|----------|----------|----------|
| C  | 0.191645 | 0.802324 | 0.086907 |
| C  | 0.324843 | 0.869059 | 0.089787 |
| C  | 0.391295 | 0.802648 | 0.098993 |
| C  | 0.525341 | 0.869675 | 0.096257 |
| C  | 0.592370 | 0.803097 | 0.097673 |
| C  | 0.725199 | 0.869160 | 0.088928 |
| C  | 0.792117 | 0.802529 | 0.087672 |
| C  | 0.925301 | 0.869100 | 0.083573 |
| Fe | 0.391124 | 0.599318 | 0.162874 |
| Fe | 0.567721 | 0.572559 | 0.211729 |

---



**Table S6 The atomic fractional coordinates of the Fe<sub>2</sub>C<sub>1</sub>N<sub>2</sub>.**

| <b>Atom</b> | <b>X</b> | <b>Y</b> | <b>Z</b> |
|-------------|----------|----------|----------|
| C           | 0.991068 | 0.004627 | 0.175106 |
| C           | 0.124327 | 0.071368 | 0.176612 |
| C           | 0.190949 | 0.004547 | 0.175142 |
| C           | 0.324267 | 0.071084 | 0.177853 |
| C           | 0.390936 | 0.004295 | 0.179953 |
| C           | 0.523879 | 0.069829 | 0.182914 |
| C           | 0.589072 | 0.000977 | 0.185267 |
| C           | 0.723195 | 0.069815 | 0.182611 |
| C           | 0.790853 | 0.004481 | 0.179570 |
| C           | 0.924162 | 0.071197 | 0.177799 |
| C           | 0.990529 | 0.204342 | 0.183126 |
| C           | 0.123337 | 0.270465 | 0.188737 |
| C           | 0.190402 | 0.204110 | 0.184038 |
| C           | 0.323600 | 0.270063 | 0.187832 |
| C           | 0.390797 | 0.204269 | 0.182788 |
| C           | 0.524168 | 0.271183 | 0.186079 |
| C           | 0.590609 | 0.203851 | 0.183973 |
| C           | 0.723812 | 0.270409 | 0.185047 |
| C           | 0.790521 | 0.203850 | 0.183858 |
| C           | 0.924209 | 0.271178 | 0.186256 |
| C           | 0.992275 | 0.405348 | 0.191006 |
| C           | 0.125025 | 0.471978 | 0.201168 |
| C           | 0.189479 | 0.401120 | 0.204858 |
| C           | 0.317006 | 0.456975 | 0.222336 |
| C           | 0.387789 | 0.401094 | 0.203108 |
| C           | 0.524309 | 0.472330 | 0.200195 |
| C           | 0.590683 | 0.405266 | 0.190644 |
| C           | 0.724074 | 0.470812 | 0.185901 |
| C           | 0.790573 | 0.403722 | 0.185031 |
| C           | 0.924135 | 0.470741 | 0.186015 |
| C           | 0.990196 | 0.603752 | 0.182723 |
| C           | 0.123246 | 0.671093 | 0.185542 |
| C           | 0.190612 | 0.607576 | 0.198996 |
| C           | 0.594254 | 0.608303 | 0.196827 |
| C           | 0.725507 | 0.671389 | 0.184488 |
| C           | 0.791149 | 0.603953 | 0.182534 |
| C           | 0.924023 | 0.670595 | 0.178830 |
| C           | 0.990721 | 0.803883 | 0.175129 |
| C           | 0.123972 | 0.870924 | 0.175026 |
| C           | 0.190164 | 0.804349 | 0.180470 |
| C           | 0.323437 | 0.871052 | 0.182908 |

---

|    |          |          |          |
|----|----------|----------|----------|
| C  | 0.386392 | 0.802198 | 0.194149 |
| C  | 0.521967 | 0.866705 | 0.191968 |
| C  | 0.593402 | 0.802612 | 0.192393 |
| C  | 0.725252 | 0.871306 | 0.181923 |
| C  | 0.791823 | 0.804556 | 0.179578 |
| C  | 0.924651 | 0.871071 | 0.174772 |
| N  | 0.317493 | 0.677172 | 0.208380 |
| N  | 0.536167 | 0.677100 | 0.204623 |
| Fe | 0.480335 | 0.465261 | 0.336340 |
| Fe | 0.398008 | 0.614635 | 0.271708 |

---

## Supplementary references

- 1 G. Rostamikia, S. Maheshwari and M.J. Janik, *Catal. Sci. Technol.*, 2019, **9** 174-181.
- 2 C. Choi, S. Back, N.-Y. Kim, J. Lim, Y.-H. Kim and Y. Jung, *ACS Catal.*, 2018, **8** 7517-7525.
- 3 W. Yang, H. Huang, X. Ding, Z. Ding, C. Wu, I.D. Gates and Z. Gao, *Electrochim. Acta*, 2020, **335**, 135667.
- 4 L. Zhang, X. Ji, X. Ren, Y. Ma, X. Shi, Z. Tian, A.M. Asiri, L. Chen, B. Tang and X. Sun, *Adv. Mater.*, 2018, **30**, 1800191.
- 5 J. Zhao, J. Zhao and Q. Cai, *Phys. Chem. Chem. Phys.*, 2018, **20**, 9248-9255.
- 6 Y. Wang, X. Cui, J. Zhao, G. Jia, L. Gu, Q. Zhang, L. Meng, Z. Shi, L. Zheng, C. Wang, Z. Zhang and W. Zheng, *ACS Catal.*, 2019, **9**, 336-344.
- 7 T. He, A.R. Puente Santiago and A. Du, *J. Catal.*, 2020, **388**, 77-83.
